1  
2  
3  
4  
5  
6  
7  
8  
9  
10  
11  
12  
13  
14  
15  
16  
17  
18  
19  
20

**Expression, not sequence, distinguishes miR-238 from its miR-239ab  
sister miRNAs in promoting longevity in *Caenorhabditis elegans***

Laura B. Chipman<sup>§</sup>, San Luc, Ian A. Nicastro, Jesse J. Hulahan, Delaney C. Dann,  
Devavrat M. Bodas, and Amy E. Pasquinelli\*

Molecular Biology Department, School of Biological Sciences, University of California,  
San Diego, La Jolla, CA 92093-0349, USA

Keywords: miRNAs, miR-238, miR-239a, miR-239b, aging, *C. elegans*

Short title: Lifespan role of miR-238/239ab family miRNAs

\*Correspondence: E-mail: [apasquinelli@ucsd.edu](mailto:apasquinelli@ucsd.edu)

Phone: 858-822-3006

FAX: 858-822-3021

Current address: <sup>§</sup>Rare Disease Research Unit, Pfizer Inc., 610 Main Street,  
Cambridge, MA 02139, USA

## 21 **Abstract**

22           MicroRNAs (miRNAs) regulate gene expression by base-pairing to target  
23 sequences in messenger RNAs (mRNAs) and recruiting factors that induce translational  
24 repression and mRNA decay. In animals, nucleotides 2-8 at the 5' end of the miRNA,  
25 called the seed region, are often necessary and sometimes sufficient for functional  
26 target interactions. MiRNAs that contain identical seed sequences are grouped into  
27 families where individual members have the potential to share targets and act  
28 redundantly. A rare exception seemed to be the miR-238/239ab family in  
29 *Caenorhabditis elegans*, as previous work indicated that loss of miR-238 reduced  
30 lifespan while deletion of the *miR-239ab* locus resulted in enhanced longevity and  
31 thermal stress resistance. Here, we re-examined these potentially opposing roles using  
32 new strains that individually disrupt each miRNA sister. We confirmed that loss of miR-  
33 238 is associated with a shortened lifespan but could detect no longevity or stress  
34 phenotypes in animals lacking miR-239a or miR-239b, individually or in combination.  
35 Additionally, dozens of genes were mis-regulated in *miR-238* mutants but almost no  
36 gene expression changes were detected in either *miR-239a* or *miR-239b* mutants  
37 compared to wild type animals. We present evidence that the lack of redundancy  
38 between *miR-238* and *miR-239ab* is independent of their sequence differences; miR-  
39 239a or miR-239b could substitute for the longevity role of miR-238 when expressed  
40 from the *miR-238* locus. Altogether, these studies disqualify miR-239ab as negative  
41 regulators of aging and demonstrate that expression, not sequence, dictates the specific  
42 role of miR-238 in promoting longevity.

43

## 44 **Author Summary**

45           MicroRNAs (miRNAs) are tiny non-coding RNAs that function in diverse  
46 biological pathways. To exert their regulatory influence, miRNAs bind to specific target  
47 RNAs through partial base-pairing. A critical aspect of this miRNA-target engagement is  
48 the seed sequence, nucleotides 2-8 of the miRNA. MiRNAs that share seed sequences  
49 are grouped into families and presumed to have similar functions. Yet, other factors,  
50 such as non-seed sequences in the miRNA and its expression level, can also contribute  
51 to target regulation and result in distinct roles for miRNAs within a family. To better  
52 understand how miRNA family members can have specific functions, we focused on  
53 miR-238 and its sisters, miR-239a and miR-239b, because these miRNAs had  
54 previously been reported to play opposing longevity roles in the nematode *C. elegans*.  
55 Using new genetic tools, we found that loss of miR-238 alone leads to the misregulation  
56 of many genes and a reduced lifespan. However, the lack of miR-239a, miR-239b, or  
57 both sisters had almost no effect on gene expression or longevity compared to wild type  
58 animals. Strikingly, though, miR-239a or miR-239b could substitute for the aging role of  
59 miR-238 when expressed from the miR-238 locus. Thus, expression, not sequence, is  
60 the predominant distinguishing feature of miR-238 that bestows upon it a role in aging  
61 not shared with the other family members.

62

## 63 **Introduction**

64           MicroRNAs (miRNAs) are small, ~22 nucleotide (nt), RNA regulators that post-  
65 transcriptionally repress target RNAs in a sequence dependent manner [1–3]. Most  
66 metazoan miRNAs are transcribed into long primary miRNAs (pri-miRNAs) by RNA Pol

67    It with a stem-loop structure that is recognized and processed into a ~60 nt precursor  
68    miRNA (pre-miRNA) [4,5]. Dicer cuts both strands of the pre-miRNA stem-loop  
69    structure, leaving a miRNA duplex where one strand will be degraded and the other  
70    bound by an Argonaute (AGO) protein [2,6]. Once a miRNA is loaded into AGO, it forms  
71    the core of the miRNA induced silencing complex (miRISC), which induces translational  
72    inhibition and decay of the target RNA [2]. While animal miRNAs typically use partial  
73    base-pairing to engage a target sequence, perfect complementarity with miRNA  
74    nucleotides 2-8, called the “seed”, is a predominant feature of target recognition [2,7].  
75    Structural studies have revealed that the nucleotides available for initial target  
76    recognition and base-pairing are limited to the seed region in miRNAs bound by  
77    Argonaute [8,9]. Due to the importance of the miRNA seed sequence in targeting as  
78    well as being the most evolutionarily conserved region, miRNAs that share a seed  
79    sequence are grouped into families [2]. Given the reliance of targeting on the seed  
80    sequence, it is often assumed that miRNA family members function redundantly. This  
81    idea is supported by numerous studies showing that loss of entire miRNA families, and  
82    not individual members, is often required for phenotypic consequences [10–13].

83        Yet, recent work has highlighted that sequences beyond the seed, as well as  
84    miRNA expression levels, can also play roles in determining functional miRNA-target  
85    interactions [2,14]. High-throughput capture assays of miRNA-target complexes have  
86    revealed a high frequency of interactions with partial or poor seed matches between the  
87    miRNA and its target RNA, some with extensive base-pairing to the 3’ end of the miRNA  
88    [15–19]. Biochemical and structural studies have shown that increased 3’ end pairing  
89    can strengthen miRNA repression by increasing miRNA-target affinity [20–23]. As well,

90 *in vivo* studies in *C. elegans* have shown that pairing of the 3' region of the miRNA can  
91 facilitate miRNA-target interactions and confer target specificity among miRNA family  
92 members who share their seed sequence but differ in their 3' ends [15,24–26].  
93 Furthermore, increases in miRNA concentration can sometimes compensate for  
94 suboptimal pairing architectures [24]. At the same time, there is evidence that  
95 sequences in the 3' half of some miRNAs are irrelevant for *in vivo* functions [12,27].  
96 Thus, the role of individual miRNA family members that differ in 3' end sequences,  
97 expression levels, and locations can be unpredictable.

98         A particularly intriguing miRNA family is the miR-238/239ab family in *C. elegans*.  
99 The miR-238, miR-239a, and miR-239b miRNAs are identical from nucleotides 1-8 and  
100 then diverge, with maintenance of a high degree of homology between the miR-239a  
101 and miR-239b 3' ends. Moreover, strains that lack miR-238 or miR-239ab were reported  
102 to exhibit opposite longevity phenotypes [28]. While *miR-238(-)* had a reduced lifespan,  
103 a strain deleted of *miR-239a*, *miR-239b*, and their surrounding genomic sequences  
104 (*nDf62*) showed an extended lifespan [28]. Additionally, the *nDf62* strain displayed  
105 enhanced resistance to heat and oxidative stress, whereas *miR-238* mutants were more  
106 sensitive to oxidative stress and survived at a rate comparable to that of wildtype worms  
107 in a thermal stress assay [28]. Thus, the miR-238/239ab family has been considered an  
108 unusual example of related miRNAs with opposing roles in longevity and stress  
109 pathways.

110         In this study, we set out to better define the contribution of the individual miR-  
111 238/239ab family members to the regulation of lifespan and thermal resistance in *C.*  
112 *elegans*. Consistent with previous work [28], we found that deletion of *miR-238* alone

113 resulted in a shortened lifespan. However, neither individual nor combined loss of miR-  
114 239a and miR-239b produced the enhanced longevity or heat stress tolerance  
115 previously attributed to deletion of these miRNAs. The single *miR-239a* and *miR-239b*  
116 mutant strains also displayed almost no changes in gene expression compared to  
117 wildtype animals, whereas ~70 genes were mis-regulated in the *miR-238* mutants. In  
118 addition to divergence in 3' end sequences, differences in expression could underlie the  
119 inability of miR-239ab to compensate for the loss of miR-238. Consistent with the latter  
120 possibility, we found that rescue of the reduced lifespan caused by loss of miR-238 was  
121 achieved by replacing the precursor for miR-238 with that of miR-239a or miR-239b at  
122 the endogenous *miR-238* locus. Altogether, our data reveal that the miR-238/239ab  
123 family plays a positive role in aging that is primarily reliant on expression and  
124 independent of sequence differences among the miRNAs.

125

## 126 **Results**

127

### 128 **Levels of miR-238, miR-239a, or miR-239b are minimally perturbed by** 129 **loss of other family members**

130 As members of the same miRNA family in *C. elegans*, the miR-238, miR-239a,  
131 and miR-239b miRNAs share their seed sequence, nucleotides 2-8, but differ to varying  
132 degrees in their 3' ends (Fig 1A-C). The previous deletion strain (*nDf62*) used to  
133 characterize the function of miR-239a and miR-239b removes both miRNA sisters, as  
134 well as a ncRNA and snoRNA (Fig 1A) [13]. This is unlike the *miR-238(n4112)* allele,

135 which disrupts the *miR-238* gene and no other annotated genes in the vicinity (Fig 1B)  
136 [13]. To study the contribution of the individual miRNA sisters, miR-239a and miR-239b,  
137 to aging phenotypes, we used CRISPR/Cas9 to create new, single loss of function  
138 (LOF) alleles. Due to the high sequence similarity within the mature miR-238, miR-239a,  
139 and miR-239b sequences, we targeted the pre-miRNA to disrupt miRNA processing  
140 and, thus, mature miRNA levels. Using this strategy, we made a new LOF allele for  
141 miR-239a, *miR-239a(ap439)*, two new LOF alleles for miR-239b, *miR-239b(ap432)* and  
142 *miR-239b(ap433)*, and a miR-239a and miR-239b dual LOF strain *miR-*  
143 *239a/b(ap435,ap432)* (Fig 1A). These disruptions prevented the accumulation of  
144 mature miRNAs, as we were unable to detect miR-239a or miR-239b in their  
145 corresponding mutant backgrounds (Fig 1D). In the dual LOF strain *miR-*  
146 *239a/b(ap435,ap432)*, miR-239a was barely detectable at levels less than 1% of WT  
147 expression, indicating that there is drastically impaired production of miR-239a from the  
148 *ap435* allele (Fig 1D). To test if these disruptions in miR-238, miR-239a, or miR-239b  
149 mature miRNA production led to altered expression of the other sisters, we examined  
150 the mature miRNA levels of each sister in *miR-238(n4112)*, *miR-239a(ap439)*, *miR-*  
151 *239b(ap432)* individual LOF strains as well as in the double mutant, *miR-*  
152 *239a/b(ap435,ap432)*. Little if any change was detected for any of the miRNA sisters  
153 upon deletion of one or two members of its family (Fig 1D). These results confirm that  
154 we have valid new tools to assess how loss of individual miR-238/239ab miRNA sisters  
155 contributes to aging.

156

157 **Loss of miR-238 leads to a reduced lifespan, while loss of miR-239a or**  
158 **miR-239b has no effect on *C. elegans* lifespan**

159 As seen in previous work, we observed that loss of *miR-238(n4112)* resulted in a  
160 reduced lifespan, implicating it as a positive regulator of longevity (Fig 2A) [28]. In  
161 contrast to the previously published extended lifespan attributed to loss of miR-239ab in  
162 the *nDf62* strain [28], individual or coupled loss of miR-239a and miR-239b did not  
163 significantly alter lifespan compared to WT (Fig 2A and B). Furthermore, a strain lacking  
164 expression of the entire miR-238/239ab family had a similarly reduced lifespan as loss  
165 of miR-238 alone (Fig 2A). Together, these data suggest that miR-238 plays an  
166 important role in aging adults, while miR-239a and miR-239b have no influence on  
167 lifespan.

168

169 **The miR-238/239ab family is nonessential for fertility and heat stress**  
170 **recovery in early adulthood**

171 The reduced lifespan of *miR-238(n4112)* is not apparently linked to any obvious  
172 developmental or other defects [13,28]. We also found that the loss of miR-238 or miR-  
173 239b had no significant effect on fertility, as judged by brood size analysis (Fig 2C-D).  
174 While the *miR-239a(ap439)* mutants produced slightly fewer progeny than WT animals,  
175 this difference was not observed in the double *miR-239a(ap435)*, *miR-239b(ap432)* or  
176 triple *miR-238(n4112)*; *miR-239a(ap435)*, *miR-239b(ap432)* loss of function strains (Fig  
177 2C-D). Overall, the miR-238/239ab family seems to have a minor, if any, role in  
178 development and fertility under typical laboratory conditions.



179           The miR-238/239ab family has also been reported to differentially regulate stress  
180 responses. Previously, the *miR-239a/b(nDf62)* strain was shown to have increased  
181 thermotolerance and thermoresistance in adults [28,29]. While the *miR-238(n4112)*  
182 strain did not exhibit a heat shock phenotype, it was more sensitive to oxidative stress,  
183 and, conversely, *miR-239a/b(nDf62)* animals were more resistant to this stress than WT  
184 [28]. When we attempted to recapitulate the thermotolerance assay, which subjected  
185 day 2 adults to 12hr of heat shock at 35°C [28], all animals died. However, a  
186 thermoresistance assay, where day 2 adults were exposed to 15hr of heat shock at  
187 32°C and scored for survival after a 24hr recovery period at 20°C, resulted in survival of  
188 WT animals at levels previously observed for this assay (Fig 2E and F) [29]. Although all  
189 the individual and combined mutant strains trended towards lower survival rates  
190 compared to WT, there was no statistically significant difference (Fig 2E and F). Taken  
191 together, the miR-238/239ab family does not substantially contribute to  
192 thermoresistance, as assayed here in adult *C. elegans*.

193

## 194 **Non-overlapping sets of genes are mis-regulated upon loss of each** 195 **miR-238/239ab family member**

196           Given that miRNAs are post-transcriptional gene regulators that often induce  
197 degradation of their target mRNAs [30], we asked if similar sets of genes would be mis-  
198 regulated upon loss of each miR-238/239ab family member. We performed  
199 transcriptomic analysis on day 5 adult animals of the individual *miR-238*, *miR-239a*, and  
200 *miR-239b* mutants, along with WT for comparison (S1 Table). In the *miR-238(n4112)*  
201 mutants, there was significant ( $p_{adj} < 0.05$  and  $baseMean > 100$ ) up-regulation of 25

202 genes and down-regulation of 44 genes (Fig 3A). In contrast, for the *miR-239a(ap439)*  
203 and *miR-239b(ap432)* loss of function mutants, very few genes were found to be  
204 differentially expressed compared to WT (Fig 3B-C). The single gene mis-regulated in  
205 the *miR-239a* mutant is *C34E11.20*, a snoRNA adjacent to *miR-239a* (Fig 1A, Fig 3B).  
206 While the *ap439* deletion does not span the annotated *C34E11.20* gene locus, the  
207 genomic disruption, rather than the loss of miR-239a, is likely responsible for the altered  
208 expression of this snoRNA. None of the mis-regulated genes in the three mutant  
209 backgrounds has a miR-238/239 binding site predicted by TargetScan [31,32],  
210 suggesting that the change in mRNA levels is an indirect consequence of loss of the  
211 miRNAs. Although it is possible that these miRNAs primarily cause translational  
212 repression without substantial target mRNA degradation at this time point in adulthood,  
213 the lack of over-lapping downstream effects suggests that miR-238, miR-239a and miR-  
214 239b mostly regulate different genes. Furthermore, these data reflect the lifespan  
215 phenotypes with loss of miR-238 resulting in a greater extent of gene mis-regulation and  
216 a reduced lifespan and loss of miR-239a or miR-239b having almost no effect on gene  
217 expression and longevity.

218

## 219 **Members of the miR-238/239ab miRNA family are differentially** 220 **expressed**

221 Members of the miR-238/239ab family were originally identified as potential  
222 regulators of longevity due to their increase in expression during aging [28]. To further  
223 study the levels of these miRNAs in adult animals, we performed small RNA  
224 transcriptomics on adult day 5 wildtype (WT) animals (S2 Table). Along with a

225 previously generated small RNA-seq (smRNA-seq) dataset from larval stage 4 (L4) WT  
226 worms [33], we ranked the expression of miR-238, miR-239a and miR-239b relative to  
227 all other detected miRNAs (Fig 4A). From these rankings, miR-238 is the most  
228 abundantly detected family member in L4 and day 5 (Fig 4A). Additionally, miR-238 has  
229 a slight increase in ranking from L4 to day 5 (Fig 4A). Both miR-239a and miR-239b  
230 increase in ranking ~2 fold from L4 to day 5 but still are detected less frequently than  
231 miR-238 (Fig 4A).

232 Previous studies have also noted differences in the spatial expression patterns of  
233 miR-238 and miR-239ab [28,34,35]. We made similar observations when we examined  
234 GFP expression driven by the promoters, defined as ~2kb of sequence upstream of the  
235 mature miRNA sequence, of miR-238 and miR-239b in adult day 5 animals. The  $\rho$ miR-  
236 238::GFP reporter was transcribed nearly ubiquitously, with highest levels detected in  
237 the intestine, hypodermis, and rectal glands (Fig 4B). In contrast, expression from the  
238  $\rho$ miR-239b::GFP reporter was more concentrated in the neurons and vulval cells (Fig  
239 4C).

240 We also explored the relationship of the miR-238/239ab miRNAs to the  
241 Argonaute Like Gene proteins, ALG-1 and ALG-2. It was previously reported that ALG-1  
242 and ALG-2 have differing spatial expression patterns in aging and play opposing roles in  
243 *C. elegans* longevity [36]. Thus, examining how miR-238, miR-239a, and miR-239b  
244 interact with ALG-1 and ALG-2 could inform on aging roles for these three miRNAs. We  
245 ranked miRNA association with ALG-1 and ALG-2 from day 5 RNA immunoprecipitation  
246 data [36], and performed small RNA-seq in day 5 *alg-1(gk214)* and *alg-2(ok304)* mutant  
247 strains (Fig 4A, S2 Table). All three miRNAs immunoprecipitate with ALG-1 and ALG-2 at

248 levels relatively commensurate with their levels of detection in total smRNA-seq at day 5  
249 of adulthood (Fig 4A). Despite this proportionate association with AGOs, the miR-238,  
250 miR-239a, miR-239b miRNAs have different sensitivities to the loss of *alg-1*: compared  
251 to WT, miR-238 is ~3-fold down in *alg-1(gk214)*, while miR-239b is ~2-fold up, and there  
252 is no significant change for miR-239a (Fig 4A). No significant changes in these miRNAs  
253 were detected in *alg-2(ok304)* compared to WT day 5 animals (Fig 4A). The variable  
254 sensitivity to loss of *alg-1* further shows that the expression and/or stability of miR-238,  
255 miR-239a, and miR-239b are subject to differential regulation.

256

## 257 **The longevity role of miR-238 can be replaced by miR-239a or miR-** 258 **239b**

259 Despite belonging to the same miRNA family, the loss of miR-238 causes a  
260 reduced lifespan with many transcripts mis-regulated, while the loss of miR-239a or  
261 miR-239b results in no apparent effect on lifespan and mis-regulation of very few genes  
262 (Fig 2A-B, Fig 3A-C). These distinctions could be due to differences in miRNA  
263 expression (Fig 4) or in target RNA interactions due to nonidentical 3' end sequences  
264 (Fig 1C), or a combination of both. To investigate these possibilities, we used  
265 CRISPR/Cas9 to replace the endogenous pre-miR-238 with the sequence for pre-miR-  
266 239a or pre-miR-239b (Fig 5A). In these newly created strains, we detected increased  
267 levels of miR-239a and miR-239b specifically in the corresponding strains with the pre-  
268 miRNA replacing miR-238, consistent with expression from the miR-238 locus in  
269 addition to the endogenous gene (Fig 5B). The elevated expression of miR-239a or

270 miR-239b from the *miR-238* locus resulted in no apparent effect on brood size or  
271 thermotolerance as compared to WT animals (Fig 5C-D).

272 We then asked if replacement of miR-238 with miR-239a or miR-239b would  
273 prevent the reduced lifespan caused by loss of miR-238. In lifespan analyses, the *pmiR-*  
274 *238::miR-239a* and *pmiR-238::239b* strains had survival curves indistinguishable from  
275 that of WT animals and were significantly longer lived than the *miR-238(n4112)* strain  
276 (Fig 5E). Overall, these data show that expression of miR-239a or miR-239b from the  
277 *miR-238* locus can rescue the reduced lifespan associated with loss of miR-238. Thus,  
278 differences in expression, and not the 3' end sequences, underlie the distinct role in  
279 aging of miR-238 compared to its sister miRNAs, miR-239ab.

280

## 281 Discussion

282 Here, we investigated the individual roles of the miR-238/239ab miRNAs in adult  
283 *C. elegans*. We confirmed that the loss of miR-238 leads to a reduced lifespan but could  
284 not detect a longevity phenotype in animals lacking mature miR-239a or miR-239b.  
285 Additionally, the loss of individual or combined miR-238/239ab family members did not  
286 obviously impact fertility or thermoresistance. Consistent with the phenotypic  
287 observations, dozens of genes were mis-regulated *miR-238(-)* adults, while almost no  
288 changes in gene expression were detected in the *miR-239a* or *miR-239b* mutant strains.  
289 We found that the functional differences between miR-238 and its miR-239ab sisters  
290 result predominantly from expression and not sequence distinctions. Thus, the miR-  
291 238/239ab family of miRNAs positively regulates longevity through a mechanism that  
292 largely depends upon expression but not sequences beyond the seed region.

293

## 294 **The role of miR-238/239ab in stress and aging**

295           Members of the miR-238/239ab family of miRNAs were among the first miRNAs  
296 proposed to regulate longevity in any organism [37]. Moreover, these miRNAs seemed  
297 to play opposing roles, as loss of miR-238 resulted in a shortened lifespan, while  
298 deletion of miR-239ab resulted in an extended lifespan and increased tolerance to heat  
299 and oxidative stress [28]. The best available reagent at the time of those studies was  
300 the *nDf62* strain, which has a 2,333 base pair deletion that removes both *miR-239a* and  
301 *miR-239b*, as well as an annotated non-coding RNA (*C34E11.9*) and small nucleolar  
302 RNA (snoRNA) (*C34E11.20*) (Figure 1A). Subsequent work confirmed enhanced  
303 thermal resistance but failed to reproduce a lifespan phenotype for the *nDf62* deletion  
304 strain [29,38]. It is currently unclear if the basis for the discrepancy in an aging  
305 phenotype for the *nDf62* strain is due to assay differences or unrecognized strain  
306 polymorphisms.

307           With the newer availability of gene editing tools, we were able to examine more  
308 precisely the roles of miR-239ab in aging and heat stress. In strains lacking expression  
309 of mature miR-239a, miR-239b or both miRNAs, no differences in lifespan or  
310 thermoresistance were detected when compared to WT animals. Likewise, almost no  
311 changes in gene expression were apparent in WT versus *miR-239a(-)* or *miR-239b(-)*  
312 day five adults. Thus, our work indicates that loss of the miR-239ab miRNAs is unlikely  
313 to contribute to any effects on longevity or thermal stress previously assigned to the  
314 *nDf62* strain.

315           Regardless of a functional role in aging or stress, miR-239ab have been  
316 consistently identified as miRNAs up-regulated under those conditions [28,29,33,39].  
317 Additionally, a strain expressing GFP driven by the *miR-239* promoter was found to be a  
318 predictor of longevity; higher levels of GFP correlated with shorter lifespans in individual  
319 transgenic animals [35]. In a previous study, we identified a Heat Shock Element (HSE)  
320 bound by Heat Shock Factor 1 (HSF-1) that is situated between the *mir-239a* and *miR-*  
321 *239b* loci [33]. Additionally, we showed that increased expression of miR-239b upon  
322 heat shock is dependent on HSF-1 [33]. The increased expression of miR-239ab in  
323 aging animals could reflect the activity or availability of HSF-1. The Heat Shock  
324 Response (HSR), including the ability to up-regulate several Heat Shock Proteins  
325 (HSPs), declines abruptly in young *C. elegans* adults [40,41]. This event is due to  
326 formation of repressive chromatin at *hsp* promoters rather than obvious changes in  
327 HSF-1 levels or DNA binding ability [41]. It is possible that exclusion of HSF-1 from *hsp*  
328 genes in early adulthood allows for greater occupancy at other targets, including the  
329 HSE proximal to *miR-239ab*. Thus, the correlation between higher expression driven by  
330 the *miR-239* promoter and reduced life expectancy in individual *C. elegans* may reflect  
331 aberrant reprogramming of HSF-1 and/ or triggering of a stress response in young  
332 adults.

333           As previously reported, we observed that loss of miR-238 results in a markedly  
334 reduced lifespan [28]. A strain lacking expression of all three miR-238/239ab miRNA  
335 sisters phenocopies the shortened lifespan of *miR-238(-)* mutants, indicating that miR-  
336 238 alone regulates longevity. Loss of miR-238 or the entire miR-238/239ab family of  
337 miRNAs has no obvious impact on development or fertility in animals grown under

338 standard lab conditions at 20°C. Thus, the reduced lifespan of *miR-238(-)* mutants does  
339 not seem to be the result of general unhealthiness. While dozens of genes were found  
340 to be mis-regulated in *miR-238(n4112)* day 5 adults, none of them are predicted targets  
341 of this miRNA [31,32]. Nor do the gene expression changes point towards a pathway  
342 that might explain the early death of these animals. So far, the only validated target of  
343 miR-238 is the nicotinic acetylcholine receptor (nAChR), *acr-19* [42]. While mis-  
344 regulation of *acr-19* in *miR-238* mutant animals caused an abnormal nicotine withdrawal  
345 response [42], this role is unlikely to be related to the lifespan function of miR-238, as  
346 expression of this target was unchanged in *miR-238(n4112)* compared to WT day 5  
347 adults.

348

### 349 **Redundant and distinct functions of miRNA family members**

350         Considering the key role of the seed sequence in miRNA-target interactions [2], it  
351 is reasonable to expect that members of a miRNA family will have overlapping targets  
352 and, hence, functions. While this appears to be the case for some miRNA families, such  
353 as mir-35-42 and miR-51-56 in *C. elegans* [10–12], there are also examples of single  
354 family members having specific targets and roles [2]. Differences in 3' end sequences  
355 can bias target interactions to favor pairing with individual family members [14]. Cross-  
356 linking and immunoprecipitation with sequencing (CLIP-seq) assays that isolated  
357 chimeric sequences consisting of a target site ligated to a miRNA have revealed  
358 numerous instances of target occupancy restricted to a specific miRNA sister [15,18].  
359 Favored binding affinities mediated by distinct 3' end sequences likely explain some of  
360 these specific miRNA-target interactions [15,18]. As the aging function of miR-238 could



361 be replaced by miR-239a or miR-239b, sequence divergence among these miRNA  
362 sisters appears irrelevant for the distinct longevity role of miR-238 in adult *C. elegans*.

363 Differences in expression levels or domains can also lead to specific roles for  
364 miRNA family members [2]. Reporter-based and biochemical methods have shown that  
365 many *C. elegans* miRNAs, including some that belong to families, exhibit distinct  
366 temporal and spatial expression patterns [34,43–46]. Even miRNAs that are co-  
367 expressed as part of a mirtron can accumulate disproportionately, due to differences in  
368 processing and/or stability of the mature forms [12]. Here and in prior studies using  
369 reporter strains containing GFP fused to miRNA promoter sequences, expression of  
370 miR-238 appeared ubiquitous, whereas expression of miR-239 was primarily observed  
371 in neuronal and vulval cells in adult animals [28,34,35]. However, isolation of mature  
372 miRNAs directly, or as part of Argonaute complexes, from neuronal, pharyngeal,  
373 intestinal or body wall muscle cells did not reveal obvious differences in tissue specific  
374 accumulation of miR-238/239ab family miRNAs [43–46]. Yet, we found that miR-239a or  
375 miR-239b could replace miR-238 function when expressed from the *miR-238* locus.  
376 These results suggest that regulatory elements in the *miR-238* gene control the  
377 expression of this sister miRNA in a manner needed for its longevity role.

378 In conclusion, this study corroborates that *miR-238* promotes longevity and  
379 contradicts a previously ascribed role for *miR-239ab* in limiting lifespan [28]. Moreover,  
380 we demonstrate that differences in expression, but not sequence, explain the inability of  
381 miR-239ab miRNAs to compensate for the loss of miR-238. This feature of the miR-  
382 238/238ab family may provide flexibility to maintain target regulation under conditions  
383 encountered in the wild that change the expression of individual sisters.

## 384 **Materials and Methods**

### 385 **Strain Generation**

386 CRISPR/Cas9 genome editing methods were used to generate the miR-239a  
387 and miR-239b LOF and the miR-238 replacement strains. PQ636 *miR-239a(ap439)*,  
388 PQ592 *miR-239b(ap432)*, PQ593 *miR-239b(ap433)* and PQ600 *miR-239a(ap435)*, *miR-*  
389 *239b(ap432)* were generated by following methods described in Paix *et al.* with  
390 modifications suggested by the Dernburg lab [47]. Young adult wildtype worms (N2)  
391 were injected with mixes that included 0.5 uL of *dpy-10* crRNA (100uM), 1.0 uL of the  
392 appropriate crRNA, 2.5 uL of tracrRNA (100uM), and 7uL of Cas9 (40uM); Cas9 protein,  
393 tracrRNA, and crRNA were ordered from IDT. Worms were grown at 25°C. 3 days later,  
394 *dpy + C. elegans* were singled onto new plates and PCR screened for disruptions in the  
395 *miR-239a* or *miR-239b* genes. To make the PQ679 - *miR-238(ap445[PmiR-238::pre-*  
396 *miR-239a::miR-238 UTR] III)*; and PQ680 - *miR-238(ap446[PmiR-238::pre-miR-*  
397 *239b::miR-238 UTR] III)*; strains, young adult wildtype worms (N2) were injected  
398 following methods for dsDNA asymmetric-hybrid donors as described in Dokshin *et al.*  
399 [48]. The injection mix included 5µg Cas9 protein, 2mg tracrRNA, 1.12µg crRNA, 800ng  
400 pRF4::rol-6 plasmid and 4µg of a dsDNA donor cocktail. Homology arms were 120bp  
401 long. F1 rollers were singled onto new plates as well as non-roller siblings from the  
402 same plate. After laying progeny, F1 were lysed and PCR screened for integration of  
403 the pre-miR-239a or pre-miR-239b sequence into the *miR-238* locus. Editing was  
404 confirmed by Sanger sequencing and successful mutant strains were backcrossed at  
405 least three times to N2. All strains and oligonucleotide sequences are listed in  
406 Supplemental Table S3.

407 In Vivo Biosystems was contracted to generate the *pmiR-239b::GFP* strain  
408 (COP2506). Using MosSCI transgenesis methods [49], genetic cargo containing *pmir-*  
409 *239.b::GFP* and an *unc-119* rescue cassette, was injected for insertion into the *ttTi5605*  
410 *Mos1* locus on chr2 in the *C. elegans* genome. Candidate lines were screened for  
411 rescue of function on the *unc-119(ed3) III* mutant allele and insertion confirmed by  
412 genotyping.

413

#### 414 **Nematode culture and lifespan analyses**

415 *C. elegans* strains were cultured under standard conditions and synchronized by  
416 hypochlorite treatment [50]. Lifespan analyses were conducted at 20°C in the absence  
417 of FUDR, as previously described [51]. Embryos were plated on NGM plates containing  
418 OP50 and the first day after the L4 stage was regarded as adult day 0. Worms were  
419 picked onto fresh food every other day until reproduction ceased and scored for viability  
420 every 2 to 3 days. Animals that died by bagging, bursting, or crawling off the plates were  
421 censored. JMP IN 16 software was used for statistical analysis and P-values were  
422 calculated using the log-rank (Mantel-Cox) method. Lifespan assays were performed in  
423 a blinded manner and statistics for all replicates (3-12 independent) are shown in  
424 Supplemental Table S4.

425

#### 426 **Brood size assays**

427 Between 5-9 individual L4 *C. elegans* of each genotype were moved to individual  
428 plates seeded the day prior with OP50. Every day post adulthood, the parental adult *C.*  
429 *elegans* was moved to a new plate, and the eggs were counted. This was done until the

430 end of the reproductive span of the individual animal. Brood size assays were  
431 performed in a blinded manner and data for all replicates (3 independent) are shown in  
432 Supplemental Table S4.

433

#### 434 **Thermotolerance assays**

435 Adult heat shock experiments were carried as described in De Lencastre *et al.*  
436 and Nehammer *et al.* with minor alterations, such as not using FuDr to stop progeny  
437 production [28,29]. For the de Lencastre *et al.* thermotolerance protocol:

438 *C. elegans* strains were cultured under standard conditions and synchronized by  
439 hypochlorite treatment [50]. Heat shock viability assays were performed by plating  
440 bleach synchronized L1 worms rocked at 20°C overnight on UV treated small NGM  
441 plates seeded with OP50 the day before. Worms were grown until L4, then for an  
442 additional 36 hours at 20°C before raising the temperature to 35°C for 12 hrs of heat  
443 shock. Assays were blinded before heat shock and were unblinded only after scoring  
444 viability. For the Nehammer *et al.* thermoresistance protocol: Gravid adults were  
445 allowed to egg lay for a 2-hour period to produce relatively synchronized populations of  
446 progeny at 20°C on UV treated NGM plates seeded with OP50 the day before. From the  
447 mid-point of the egg lay, worms were grown for 86 hours, and during the first day of  
448 adulthood worms were moved to new UV treated small NGM plates seeded with OP50  
449 the day before. Those adult worms were then incubated at 35°C for 12 hrs of heat  
450 shock. Worms recovered for 24hrs at 20°C before scoring. For all heat shock  
451 experiments, at least 100 worms were subjected to heat shock or control 20°C  
452 conditions per strain per replicate with no more than 20 worms per single small NGM

453 plate. Thermoresistance assays were performed in a blinded manner and data for all  
454 replicates (3 independent) are shown in Supplemental Table S4.

455

#### 456 **qRT-PCR**

457 RT-PCR analyses of miRNA (TaqMan) levels were performed according to  
458 manufacturer's instructions with the StepOnePlus and QuantStudio 3 Real-Time PCR  
459 Systems (Applied Biosystems). Levels were normalized to U18 snoRNA. Three  
460 biological replicates were performed with three technical replicates for each target gene.  
461 Numerical data are provided in Supplemental Table S5. Not detected (ND) was called  
462 for samples that were flagged as inconclusive or no amplification in all three biological  
463 and three technical replicates in the QuantStudio 3 Software (Thermofisher).

464

#### 465 **RNA sequencing**

466 RNA was isolated from wildtype (N2), *miR-238(n4112)*, *miR-239a(ap439)*, and  
467 *miR-239b(ap432)* day 5 adults. Adult *C. elegans* were separated from eggs and  
468 progeny daily by washing plates with M9 into conical tubes and allowing the adults to  
469 settle by gravity for a few minutes on a bench top. The supernatant containing larvae  
470 and eggs was then removed, and this process was repeated 3-15 times until eggs and  
471 larvae were no longer visible. Three independent poly(A) selected RNA-seq libraries  
472 were prepared from each strain for sequencing with the Illumina TruSeq mRNA Library  
473 Prep Kit. cDNA libraries were sequenced on an Illumina NovaSeq 6000. Libraries were  
474 at least 24 million reads per sample. Reads were aligned to the *C. elegans* genome  
475 WBcel282 assembly using STAR and the average percent of uniquely mapped reads

476 was 94% [52]. Aligned reads were sorted using Samtools [53] and reads were then  
477 quantified using featureCounts using WBcel282 gene annotations [54]. Differential  
478 expression was calculated using DESeq2 [55]. Genes with a basemean of at least 100,  
479 and adjusted p-value of  $< 0.05$  were considered significantly mis-regulated in mutant  
480 versus wild type animals (S1 Table). Volcano plots were generated using ggplot2 in R  
481 [56,57].

482

### 483 **smRNA-seq**

484 Small RNA sequencing was performed on five independent replicates of  
485 synchronized wildtype (N2), *alg-1(gk214)*, and *alg-2(ok304)* strains collected on day 5 of  
486 adulthood. Strains were cultured at 20°C to day five of adulthood and collected for RNA  
487 isolation. Eggs and progeny were separated from adult worms through daily washes  
488 with M9 solution, followed by gravity separation of pelleted adult worms from the  
489 supernatant containing eggs and progeny. The supernatant was aspirated and M9  
490 washed, this was repeated until the M9 remained clear. Total RNA was isolated and  
491 smRNA libraries were then prepared from 1 µg of total RNA using the Illumina TruSeq  
492 Small RNA Library Prep Kit. Once prepared, smRNA libraries were sent for single-end  
493 sequencing on an Illumina HiSeq 4000. Adapter sequences were removed using  
494 Cutadapt, and smRNA reads were mapped to the annotated *C. elegans* genome  
495 (WS266) using Bowtie-build to first create indices and miRDeep2 to align and quantify  
496 reads [58,59]. Differential expression analysis was performed by first normalizing reads  
497 to library size (read counts per million) and then measuring the log2foldchange of  
498 mutants to WT strains within replicates. MiRNAs were called significantly misregulated if

499 they exhibited an absolute mean log2foldchange greater than 1.5 and a padj less than  
500 0.05 in mutant versus wildtype samples. The results are summarized in Supplementary  
501 Table S2.

502

## 503 **Acknowledgements**

504 We thank members of the Pasquinelli Lab for helpful discussions and critical reading of  
505 the manuscript.

506

### 507 **Author Contributions**

508 **Conceptualization:** Laura B. Chipman, Amy E. Pasquinelli

509 **Formal analysis:** Laura B. Chipman, San Luc, Ian A. Nicastro, Amy E. Pasquinelli

510 **Funding acquisition:** Amy E. Pasquinelli

511 **Investigation:** Laura B. Chipman, San Luc, Ian A. Nicastro, Jesse Hulihan

512 **Methodology:** Laura B. Chipman, San Luc, Ian A. Nicastro, Delaney C. Dann, Devavrat

513 Bodas, Jesse J. Hulihan

514 **Supervision:** Amy E. Pasquinelli

515 **Validation:** Laura B. Chipman, San Luc, Ian A. Nicastro, Delaney C. Dann, Devavrat

516 Bodas, Jesse J. Hulihan, Amy E. Pasquinelli

517 **Visualization:** Laura B. Chipman, San Luc, Ian A. Nicastro, Amy E. Pasquinelli

518 **Writing – original draft:** Laura B. Chipman

519 **Writing – review & editing:** Laura B. Chipman, San Luc, Ian A. Nicastro, Delaney C.

520 Dann, Jesse J. Hulihan, Amy E. Pasquinelli

521

522 **FIGURE LEGENDS**

523

524 **Figure 1. Validation of individual *miR-238*, *miR-239a*, *miR-239b* loss of function**  
525 **strains.** (A-B) The genomic loci of *miR-239a* and *miR-239b* (A), and *miR-238* (B) with  
526 surrounding genomic features. Gene directionality is indicated with black arrows. The  
527 gray boxes mark regions deleted in the *miR-239ab* (*nDf62*) and *miR-238*(*n4112*) strains.  
528 New loss of function mutants generated in this study by CRISPR/Cas9 are indicated in  
529 red in the precursor structures; mature sequences are boxed. *miR-239a*(*ap439*) deletes  
530 10 nucleotides in the 3' arm of the stem and *miR-239a*(*ap435*) inserts 25 nucleotides  
531 into this region. *miR-239b*(*ap432*) deletes 15 nt at the base of the 3' arm of the stem  
532 (not all nucleotides are shown) and *miR-239b*(*ap433*) deletes the GCAAAA sequence  
533 and inserts 26 nt. (C) The *miR-238-3p*, *miR-239a-5p* and *miR-239b-5p* miRNAs share  
534 their seed sequence, nucleotides 2–8 (shaded gold), but differ in other sequences,  
535 indicated in red. (D) TaqMan RT-qPCR analysis of *miR-238*, *miR-239a*, *miR-239b*  
536 mature miRNA levels in WT, *miR-238*(*n4112*), *miR-239a*(*ap439*), *miR-239b*(*ap432*),  
537 *miR-239a/b*(*ap435,ap432*) L4 stage animals. The mean from 3 independent replicates  
538 is plotted; error bars represent SDs, dots represent individual replicates, ND = Not  
539 Detected. Statistical significance assessed by student's two-tail t-test, \*\*\* P<0.0001.

540

541 **Figure 2. The *miR-238/239a/239b* sisters have distinct roles in adult *C. elegans*.**

542 (A) Representative survival curves for WT (black), *miR-238*(*n4112*) (aqua), *miR-*  
543 *239a/b*(*ap435,ap432*) (maroon), and *miR-238*(*n4112*);*miR-239a/b*(*ap435,ap432*)  
544 (green) that show a reduced lifespan of *miR-238*(*n4112*) (aqua), and *miR-*



545 *238(n4112);miR-239a/b(ap435,ap432)* (green) compared to WT (black). \*\*\* P<0.0001  
546 (log-rank). (B) Representative survival curves for WT (black), *miR-239a(ap439)* (gold),  
547 *miR-239b(ap432)* (purple), *miR-239b(ap433)* (light purple), *miR-239a/b(ap435,ap432)*  
548 (maroon). No significant difference in lifespan when compared to WT. (C-D) Results  
549 from brood size analysis. Bar graph represents mean of three biological replicates,  
550 individual replicate data are indicated with black dots. The error bars represent SDs.  
551 (C) *MiR-238(n4112)* (aqua), *miR-239a/b(ap435,ap432)* (maroon), and *miR-*  
552 *238(n4112);miR-239a/b(ap435,ap432)* (green) do not have a statistically significant  
553 difference when compared to WT (black). ANOVA and the post hoc test (Tukey's HSD).  
554 (D) *MiR-239a(ap439)* (gold), *miR-239b(ap432)* (purple), *miR-239b(ap433)* (light purple),  
555 *miR-239a/b(ap435,ap432)* (maroon). \*P<0.05, ANOVA and the post hoc test (Tukey's  
556 HSD). (E-F) Results from heat shock assay of day 2 adults for 15 hours at 32°C  
557 followed by recovery for 24 hours at 20°C. Bar graph represents mean of three  
558 biological replicates, individual replicate data indicated with black dots. The error bars  
559 represent SDs. (E) *MiR-238(n4112)* (aqua), *miR-239a/b(ap435,ap432)* (maroon), and  
560 *miR-238(n4112);miR-239a/b(ap435,ap432)* (green) do not have a statistically significant  
561 difference when compared to WT (black). ANOVA and the post hoc test (Tukey's HSD).  
562 (F) *MiR-239a(ap439)* (gold), *miR-239b(ap432)* (purple), *miR-239b(ap433)* (light purple),  
563 *miR-239a/b(ap435,ap432)* (maroon) do not have a statistically significant difference  
564 when compared to WT (black). ANOVA and the post hoc test (Tukey's HSD).  
565  
566 **Figure 3. Non-overlapping sets of genes are mis-regulated upon loss of each miR-**  
567 **238/239ab family member.** Volcano plots representing gene expression changes upon

568 the loss of *miR-238*(*n4112*) (A), *miR-239a*(*ap439*) (B), and *miR-239b*(*ap432*) (C)  
569 compared to WT in day 5 adult *C. elegans* from three independent replicates. Colored  
570 dots (aqua for *miR-238*, gold for *miR-239a*, and purple for *miR-239b*) represent genes  
571 with a  $p_{adj} < 0.05$  and  $baseMean > 100$ . Tables list the top genes up- and down-  
572 regulated in each background.

573

574 **Figure 4. Expression differences of miR-238, miR-239a, miR-239b microRNA**

575 **family members.** (A) The levels of miR-238, miR-239a, and miR-239b detected in total  
576 RNA from L4 [33] and day 5 adults and in ALG-1 and ALG-2 RNA immunoprecipitates  
577 (RIP) from day 5 adults [36] are indicated by their rank compared to all other miRNAs  
578 detected with 1 being the most abundantly detected miRNA. Fold change (FC) in  
579 miRNA levels detected in day 5 *alg-1*(*gk214*) or *alg-2*(*ok304*) mutants compared to WT  
580 animals ( $n = 5$  independent replicates,  $p_{adj} < 0.05$  for significant FC). (B-C) Detection of  
581 microRNA expression patterns using GFP reporters fused to miR-238 (B) and miR-239b  
582 (C) promoter sequences. GFP fluorescence (*top*) taken at 10x of the whole body (300  
583 microsecond exposure) and 40x of the head, mid-section, and tail (25 microsecond  
584 exposure) with accompanying DIC images (*bottom*).

585

586 **Figure 5. The longevity role of miR-238 can be replaced by miR-239a or miR-239b.**

587 (A) Schematic of the *miR-238* locus in WT ( $p_{miR-238}::miR-238$ ) (*top*), in the  $p_{miR-}$   
588  $238::miR-239a$  strain (*middle*), and the  $p_{miR-238}::miR-239b$  strain (*bottom*). (B) TaqMan  
589 RT-qPCRs of miR-238, miR-239a, miR-239b mature miRNA levels in the  $p_{miR-}$   
590  $238::miR-239a$ , and  $p_{miR-238}::miR-239b$  replacement strains compared to the *miR-*

591 *238(n4112)* background at day 5 of adulthood. The mean from 3 independent replicates  
592 is plotted; individual replicate data indicated with dots and error bars represent SDs. (C)  
593 Results from brood size analysis; *miR-238(n4112)* (aqua), *ρmiR-238::miR-239a* (coral),  
594 and *ρmiR-238::miR-239b* (blue) do not have a statistically significant difference when  
595 compared to WT (black). ANOVA and the post hoc test (Tukey's HSD). Bar graph  
596 represents mean of three biological replicates; individual replicate data indicated with  
597 black dots. The error bars represent SDs. (D) Results from heat shock on day 2 adults  
598 for 15 hours at 32°C followed by recovery for 24hr at 20°C. *miR-238(n4112)* (aqua),  
599 *ρmiR-238::miR-239a* (coral), and *ρmiR-238::miR-239b* (blue) do not have a statistically  
600 significant different percent heat shock survival when compared to WT (black). ANOVA  
601 and the post hoc test (Tukey's HSD). Bar graph represents mean of three biological  
602 replicates; individual replicate data indicated with black dots. The error bars represent  
603 SDs. (E) Representative survival curves for WT (black), *miR-238(n4112)* (aqua), *ρmiR-*  
604 *238::miR-239a* (blue), and *ρmiR-238::miR-239b* (coral) showing that the reduced  
605 lifespan due to loss of miR-238 is rescued by expression of miR-239a or miR-239b from  
606 the *miR-238* locus. \*\*\* P<0.0001 (log-rank).

607

## 608 **SUPPORTING INFORMATION**

609

610 **Table S1, related to Figure 3.** Differentially expressed genes in *miR-238(n4112)*, *miR-*  
611 *239a(ap439)*, or *miR-239b(ap432)* mutants compared to WT at day 5 of adulthood.  
612 (Spreadsheet uploaded separately)

613

614 **Table S2, related to Figure 4.** Differentially expressed miRNAs in *alg-1(gk214)* or *alg-*  
615 *2(ok3034)* mutants compared to WT at day 5 of adulthood. (Spreadsheet uploaded  
616 separately)

617

618 **Table S3.** Lists of strains and oligonucleotide sequences used in this study  
619 (Spreadsheet uploaded separately)

620

621 **Table S4, related to Figures 2A-F, 5C-E.** Statistics of all lifespan, brood size and  
622 thermoresistance assays used in this study. (Spreadsheet uploaded separately)

623

624 **Table S5, related to Figures 1D, 5B.** Numerical data underlying graphs and summary  
625 statistics for qRT-PCR. (Spreadsheet uploaded separately)

626

## 627 DATA REPORTING

628 All RNA Sequencing data files have been deposited at the GEO database

629 (<https://www.ncbi.nlm.nih.gov/geo/query/acc.cgi?acc=GSE232471>) with accession

630 number GSE232471 and will be available upon acceptance of the manuscript.

631

## 632 REFERENCES

633

- 634 1. Jonas S, Izaurralde E. Towards a molecular understanding of microRNA-  
635 mediated gene silencing. *Nat Rev Genet.* 2015;16: 421–433. doi:10.1038/nrg3965
- 636 2. Bartel DP. Metazoan MicroRNAs. *Cell.* 2018;173: 20–51.

- 637 doi:10.1016/j.cell.2018.03.006
- 638 3. Frédéric P, Simard MJ. Regulation and different functions of the animal  
639 microRNA-induced silencing complex. *WIREs RNA*. 2022;13.  
640 doi:10.1002/wrna.1701
- 641 4. Gebert LFR, MacRae IJ. Regulation of microRNA function in animals. *Nat Rev*  
642 *Mol Cell Biol*. 2019;20: 21–37. doi:10.1038/s41580-018-0045-7
- 643 5. O'Brien J, Hayder H, Zayed Y, Peng C. Overview of microRNA biogenesis,  
644 mechanisms of actions, and circulation. *Front Endocrinol (Lausanne)*. 2018;9: 1–  
645 12. doi:10.3389/fendo.2018.00402
- 646 6. Medley JC, Panzade G, Zinovyeva AY. microRNA strand selection: Unwinding the  
647 rules. *Wiley Interdiscip Rev RNA*. 2021;12: 1–22. doi:10.1002/wrna.1627
- 648 7. Quévillon Huberdeau M, Simard MJ. A guide to microRNA-mediated gene  
649 silencing. *FEBS J*. 2019;286: 642–652. doi:10.1111/febs.14666
- 650 8. Sheu-Gruttadauria J, MacRae IJ. Structural Foundations of RNA Silencing by  
651 Argonaute. *J Mol Biol*. 2017;429: 2619–2639. doi:10.1016/j.jmb.2017.07.018
- 652 9. Klum SM, Chandradoss SD, Schirle NT, Joo C, MacRae IJ. Helix-7 in Argonaute2  
653 shapes the microRNA seed region for rapid target recognition. *EMBO J*. 2018;37:  
654 75–88. doi:10.15252/embj.201796474
- 655 10. Alvarez-Saavedra E, Horvitz HR. Many Families of *C. elegans* MicroRNAs Are  
656 Not Essential for Development or Viability. *Curr Biol*. 2010;20: 367–373.  
657 doi:10.1016/j.cub.2009.12.051
- 658 11. Shaw WR, Armisen J, Lehrbach NJ, Miska EA. The Conserved miR-51 microRNA  
659 Family Is Redundantly Required for Embryonic Development and Pharynx

- 660 Attachment in *Caenorhabditis elegans*. *Genetics*. 2010;185: 897–905.  
661 doi:10.1534/genetics.110.117515
- 662 12. Dexheimer PJ, Wang J, Cochella L. Two MicroRNAs Are Sufficient for Embryonic  
663 Patterning in *C. elegans*. *Curr Biol*. 2020;30: 5058-5065.e5.  
664 doi:10.1016/j.cub.2020.09.066
- 665 13. Miska EA, Alvarez-Saavedra E, Abbott AL, Lau NC, Hellman AB, McGonagle SM,  
666 et al. Most *Caenorhabditis elegans* microRNAs Are Individually Not Essential for  
667 Development or Viability. *PLoS Genet*. 2007;3: e215.  
668 doi:10.1371/journal.pgen.0030215
- 669 14. Chipman LB, Pasquinelli AE. miRNA Targeting: Growing beyond the Seed.  
670 *Trends Genet*. 2019;35: 215–222. doi:10.1016/j.tig.2018.12.005
- 671 15. Broughton JP, Lovci MT, Huang JL, Yeo GW, Pasquinelli AE. Pairing beyond the  
672 Seed Supports MicroRNA Targeting Specificity. *Mol Cell*. 2016;64: 320–333.  
673 doi:10.1016/j.molcel.2016.09.004
- 674 16. Grosswendt S, Filipchuk A, Manzano M, Klironomos F, Schilling M, Herzog M, et  
675 al. Unambiguous Identification of miRNA: Target site interactions by different  
676 types of ligation reactions. *Mol Cell*. 2014;54: 1042–1054.  
677 doi:10.1016/j.molcel.2014.03.049
- 678 17. Helwak A, Kudla G, Dudnakova T, Tollervey D. Mapping the human miRNA  
679 interactome by CLASH reveals frequent noncanonical binding. *Cell*. 2013;153:  
680 654–665. doi:10.1016/j.cell.2013.03.043
- 681 18. Moore MJ, Scheel TKH, Luna JM, Park CY, Fak JJ, Nishiuchi E, et al. MiRNA-  
682 target chimeras reveal miRNA 3'-end pairing as a major determinant of Argonaute

- 683 target specificity. *Nat Commun.* 2015;6: 1–17. doi:10.1038/ncomms9864
- 684 19. McGeary SE, Lin KS, Shi CY, Pham TM, Bisaria N, Kelley GM, et al. The  
685 biochemical basis of microRNA targeting efficacy. *Science* (80- ). 2019;366: 1–20.  
686 doi:10.1126/science.aav1741
- 687 20. Sheu-Gruttadauria J, Xiao Y, Gebert LF, MacRae IJ. Beyond the seed: structural  
688 basis for supplementary microRNA targeting by human Argonaute2. *EMBO J.*  
689 2019;38: 1–14. doi:10.15252/embj.2018101153
- 690 21. Grimson A, Farh KKH, Johnston WK, Garrett-Engele P, Lim LP, Bartel DP.  
691 MicroRNA Targeting Specificity in Mammals: Determinants beyond Seed Pairing.  
692 *Mol Cell.* 2007;27: 91–105. doi:10.1016/j.molcel.2007.06.017
- 693 22. Xiao Y, Macrae IJ. Robust differential microRNA targeting driven by  
694 supplementary interactions in vitro. *Rna.* 2020;26: 162–174.  
695 doi:10.1261/rna.072264.119
- 696 23. Becker WR, Ober-reynolds B, Jouravleva K, Jolly SM, Zamore PD, Greenleaf WJ,  
697 et al. High-Throughput Analysis Reveals Rules for Target RNA Binding and  
698 Cleavage by AGO2. *Mol Cell.* 2019; 1–15. doi:10.1016/j.molcel.2019.06.012
- 699 24. Brancati G, Großhans H. An interplay of miRNA abundance and target site  
700 architecture determines miRNA activity and specificity. *Nucleic Acids Res.*  
701 2018;46: 3259–3269. doi:10.1093/nar/gky201
- 702 25. Zhang H, Artiles KL, Fire AZ. Functional relevance of “seed” and “non-seed”  
703 sequences in microRNA-mediated promotion of *C. elegans* developmental  
704 progression. *Rna.* 2015;21: 1980–1992. doi:10.1261/rna.053793.115
- 705 26. Duan Y, Veksler-Lublinsky I, Ambros V. Critical contribution of 3’ non-seed base

- 706 pairing to the in vivo function of the evolutionarily conserved let-7a microRNA.  
707 Cell Rep. 2022;39: 110745. doi:10.1016/j.celrep.2022.110745
- 708 27. Bertolet G, Kongchan N, Miller R, Patel RK, Jain A, Choi JM, et al. MiR-146a wild-  
709 type 3' sequence identity is dispensable for proper innate immune function in vivo.  
710 Life Sci Alliance. 2019;2: 1–13. doi:10.26508/LSA.201800249
- 711 28. De Lencastre A, Pincus Z, Zhou K, Kato M, Lee SS, Slack FJ. MicroRNAs both  
712 promote and antagonize longevity in *C. elegans*. Curr Biol. 2010;20: 2159–2168.  
713 doi:10.1016/j.cub.2010.11.015
- 714 29. Nehammer C, Podolska A, Mackowiak SD, Kagias K, Pocock R. Specific  
715 microRNAs Regulate Heat Stress Responses in *Caenorhabditis elegans*. Sci Rep.  
716 2015;5: 8866. doi:10.1038/srep08866
- 717 30. Duchaine TF, Fabian MR. Mechanistic insights into microRNA-mediated gene  
718 silencing. Cold Spring Harb Perspect Biol. 2019;11: 1–22.  
719 doi:10.1101/cshperspect.a032771
- 720 31. Lewis BP, Burge CB, Bartel DP. Conserved seed pairing, often flanked by  
721 adenosines, indicates that thousands of human genes are microRNA targets.  
722 Cell. 2005;120: 15–20. doi:10.1016/j.cell.2004.12.035
- 723 32. Jan CH, Friedman RC, Ruby JG, Bartel DP. Formation, regulation and evolution  
724 of *Caenorhabditis elegans* 3'UTRs. Nature. 2011;469: 97–101.  
725 doi:10.1038/nature09616
- 726 33. Schreiner WP, Pagliuso DC, Garrigues JM, Chen JS, Aalto AP, Pasquinelli AE.  
727 Remodeling of the *Caenorhabditis elegans* non-coding RNA transcriptome by  
728 heat shock. Nucleic Acids Res. 2019;47: 9829–9841. doi:10.1093/nar/gkz693



- 729 34. Martinez NJ, Ow MC, Reece-Hoyes JS, Barrasa MI, Ambros VR, Walhout AJM.  
730 Genome-scale spatiotemporal analysis of *Caenorhabditis elegans* microRNA  
731 promoter activity. *Genome Res.* 2008;18: 2005–2015. doi:10.1101/gr.083055.108
- 732 35. Pincus Z, Smith-Vikos T, Slack FJ. MicroRNA predictors of longevity in  
733 *caenorhabditis elegans*. *PLoS Genet.* 2011;7. doi:10.1371/journal.pgen.1002306
- 734 36. Aalto AP, Nicastro IA, Broughton JP, Chipman LB, Schreiner WP, Chen JS, et al.  
735 Opposing roles of microRNA Argonautes during *Caenorhabditis elegans* aging.  
736 *PLoS Genet.* 2018;14: e1007379. doi:10.1371/journal.pgen.1007379
- 737 37. Kinser HE, Pincus Z. MicroRNAs as modulators of longevity and the aging  
738 process. *Hum Genet.* 2020;139: 291–308. doi:10.1007/s00439-019-02046-0
- 739 38. Boulias K, Horvitz HR. The *C. elegans* MicroRNA mir-71 Acts in Neurons to  
740 Promote Germline-Mediated Longevity through Regulation of DAF-16/FOXO. *Cell*  
741 *Metab.* 2012;15: 439–450. doi:10.1016/j.cmet.2012.02.014
- 742 39. Kato M, Chen X, Inukai S, Zhao H, Slack FJ. Age-associated changes in  
743 expression of small, noncoding RNAs, including microRNAs, in *C. elegans*. *RNA.*  
744 2011;17: 1804–1820. doi:10.1261/rna.2714411
- 745 40. Volovik Y, Maman M, Dubnikov T, Bejerano-Sagie M, Joyce D, Kapernick EA, et  
746 al. Temporal requirements of heat shock factor-1 for longevity assurance. *Aging*  
747 *Cell.* 2012;11: 491–499. doi:10.1111/j.1474-9726.2012.00811.x
- 748 41. Labbadia J, Morimoto RI. The biology of proteostasis in aging and disease. *Annu*  
749 *Rev Biochem.* 2015;84: 435–464. doi:10.1146/annurev-biochem-060614-033955
- 750 42. Rauthan M, Gong J, Liu J, Li Z, Wescott SA, Liu J, et al. MicroRNA Regulation of  
751 nAChR Expression and Nicotine-Dependent Behavior in *C. elegans*. *Cell Rep.*

- 752 2017;21: 1434–1441. doi:10.1016/j.celrep.2017.10.043
- 753 43. Kudlow BA, Zhang L, Han M. Systematic Analysis of Tissue-Restricted miRISCs  
754 Reveals a Broad Role for MicroRNAs in Suppressing Basal Activity of the *C.*  
755 *elegans* Pathogen Response. *Mol Cell*. 2012;46: 530–541.  
756 doi:10.1016/j.molcel.2012.03.011
- 757 44. Than MT, Kudlow BA, Han M. Functional Analysis of Neuronal MicroRNAs in  
758 *Caenorhabditis elegans* Dauer Formation by Combinational Genetics and  
759 Neuronal miRISC Immunoprecipitation. *PLoS Genet*. 2013;9.  
760 doi:10.1371/journal.pgen.1003592
- 761 45. Alberti C, Manzenreither RA, Sowemimo I, Burkard TR, Wang J, Mahofsky K, et  
762 al. Cell-type specific sequencing of microRNAs from complex animal tissues. *Nat*  
763 *Methods*. 2018;15: 283–289. doi:10.1038/nmeth.4610
- 764 46. Brosnan CA, Palmer AJ, Zuryn S. Cell-type-specific profiling of loaded miRNAs  
765 from *Caenorhabditis elegans* reveals spatial and temporal flexibility in Argonaute  
766 loading. *Nat Commun*. 2021;12. doi:10.1038/s41467-021-22503-7
- 767 47. Paix A, Folkmann A, Rasoloson D, Seydoux G. High efficiency, homology-  
768 directed genome editing in *Caenorhabditis elegans* using CRISPR-Cas9  
769 ribonucleoprotein complexes. *Genetics*. 2015;201: 47–54.  
770 doi:10.1534/genetics.115.179382
- 771 48. Dokshin GA, Ghanta KS, Piscopo KM, Mello CC. Robust Genome Editing with  
772 Short Single-Stranded and Long, Partially Single-Stranded DNA Donors in  
773 *Caenorhabditis elegans*. *Genetics*. 2018;210: 781–787.  
774 doi:10.1534/genetics.118.301532

- 775 49. Frøkjær-Jensen C, Davis MW, Hopkins CE, Newman B, Thummel JM, Olesen S,  
776 et al. Single copy insertion of transgenes in *C. elegans*. *Nat Genet.* 2008;40:  
777 1375–1383. doi:10.1038/ng.248.Single
- 778 50. Wood WB. *The Nematode Caenorhabditis elegans*. Cold Spring Harbor  
779 Laboratory. 1988. SEEMS INCOMPLETE?
- 780 51. Dillin A, Crawford DK, Kenyon C. Timing requirements for insulin/IGF-1 signaling  
781 in *C. elegans*. *Science.* 2002;298: 830–4. doi:10.1126/science.1074240
- 782 52. Dobin A, Davis CA, Schlesinger F, Drenkow J, Zaleski C, Jha S, et al. STAR:  
783 Ultrafast universal RNA-seq aligner. *Bioinformatics.* 2013;29: 15–21.  
784 doi:10.1093/bioinformatics/bts635
- 785 53. Danecek P, Bonfield JK, Liddle J, Marshall J, Ohan V, Pollard MO, et al. Twelve  
786 years of SAMtools and BCFtools. *Gigascience.* 2021;10: 1–4.  
787 doi:10.1093/gigascience/giab008
- 788 54. Liao Y, Smyth GK, Shi W. FeatureCounts: An efficient general purpose program  
789 for assigning sequence reads to genomic features. *Bioinformatics.* 2014;30: 923–  
790 930. doi:10.1093/bioinformatics/btt656
- 791 55. Love MI, Huber W, Anders S. Moderated estimation of fold change and dispersion  
792 for RNA-seq data with DESeq2. *Genome Biol.* 2014;15: 550. doi:10.1186/s13059-  
793 014-0550-8
- 794 56. Wickham H. *ggplot2: Elegant Graphics for Data Analysis*. Springer-Verlag New  
795 York; 2016. SEEMS INCOMPLETE
- 796 57. R Core Team. *R: A Language and Environment for Statistical Computing*. Vienna,  
797 Austria: R Foundation for Statistical Computing; 2021. Available: <https://www.r->

798 project.org/ SEEMS INCOMPLETE

- 799 58. Friedländer MR, MacKowiak SD, Li N, Chen W, Rajewsky N. MiRDeep2  
800 accurately identifies known and hundreds of novel microRNA genes in seven  
801 animal clades. *Nucleic Acids Res.* 2012;40: 37–52. doi:10.1093/nar/gkr688
- 802 59. Langmead B, Trapnell C, Pop M, Salzberg SL. Ultrafast and memory-efficient  
803 alignment of short DNA sequences to the human genome. *Genome Biol.* 2009;10.  
804 doi:10.1186/gb-2009-10-3-r25

805

806

807 FIGURE 1  
808

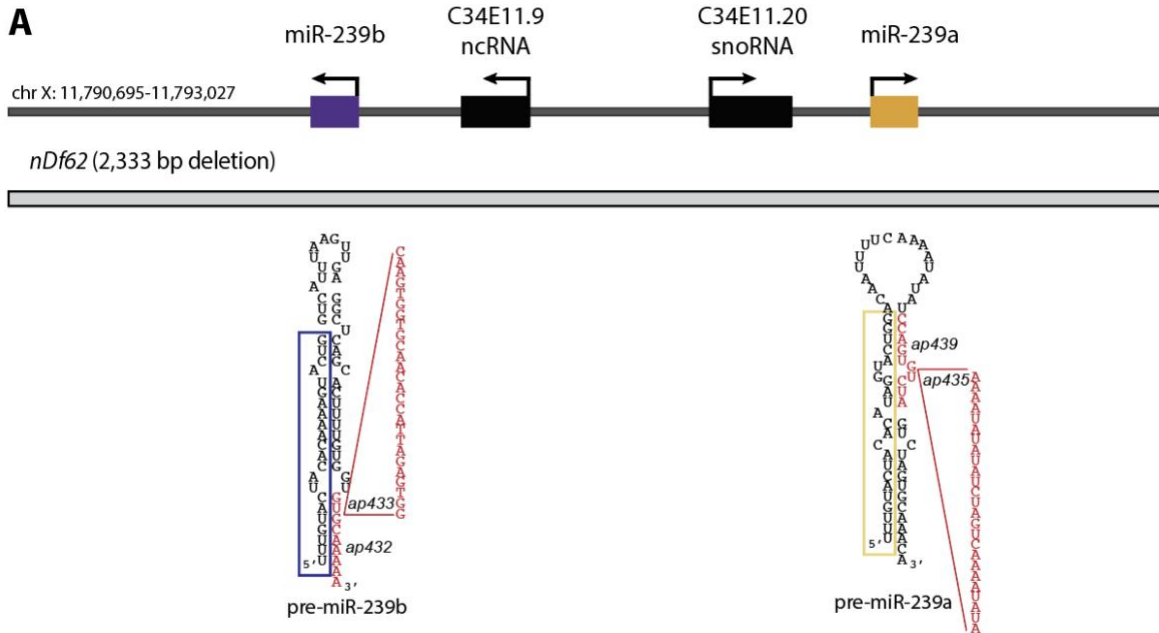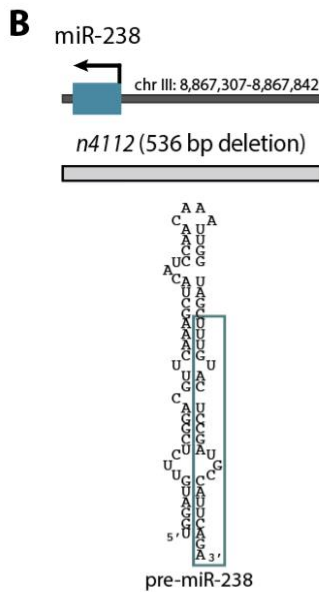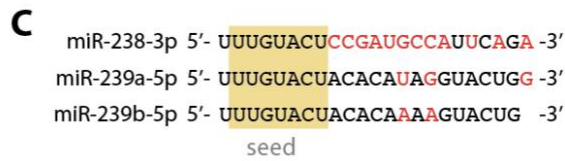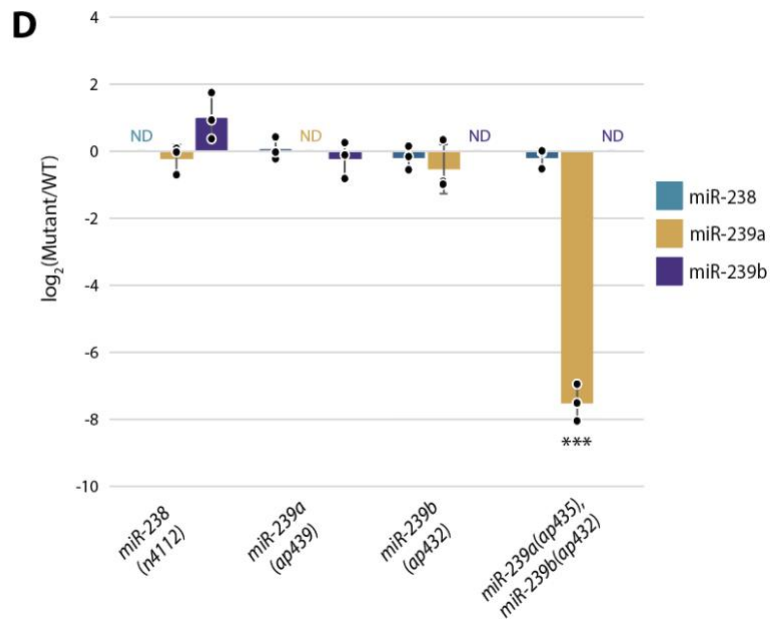

809

810 FIGURE 2

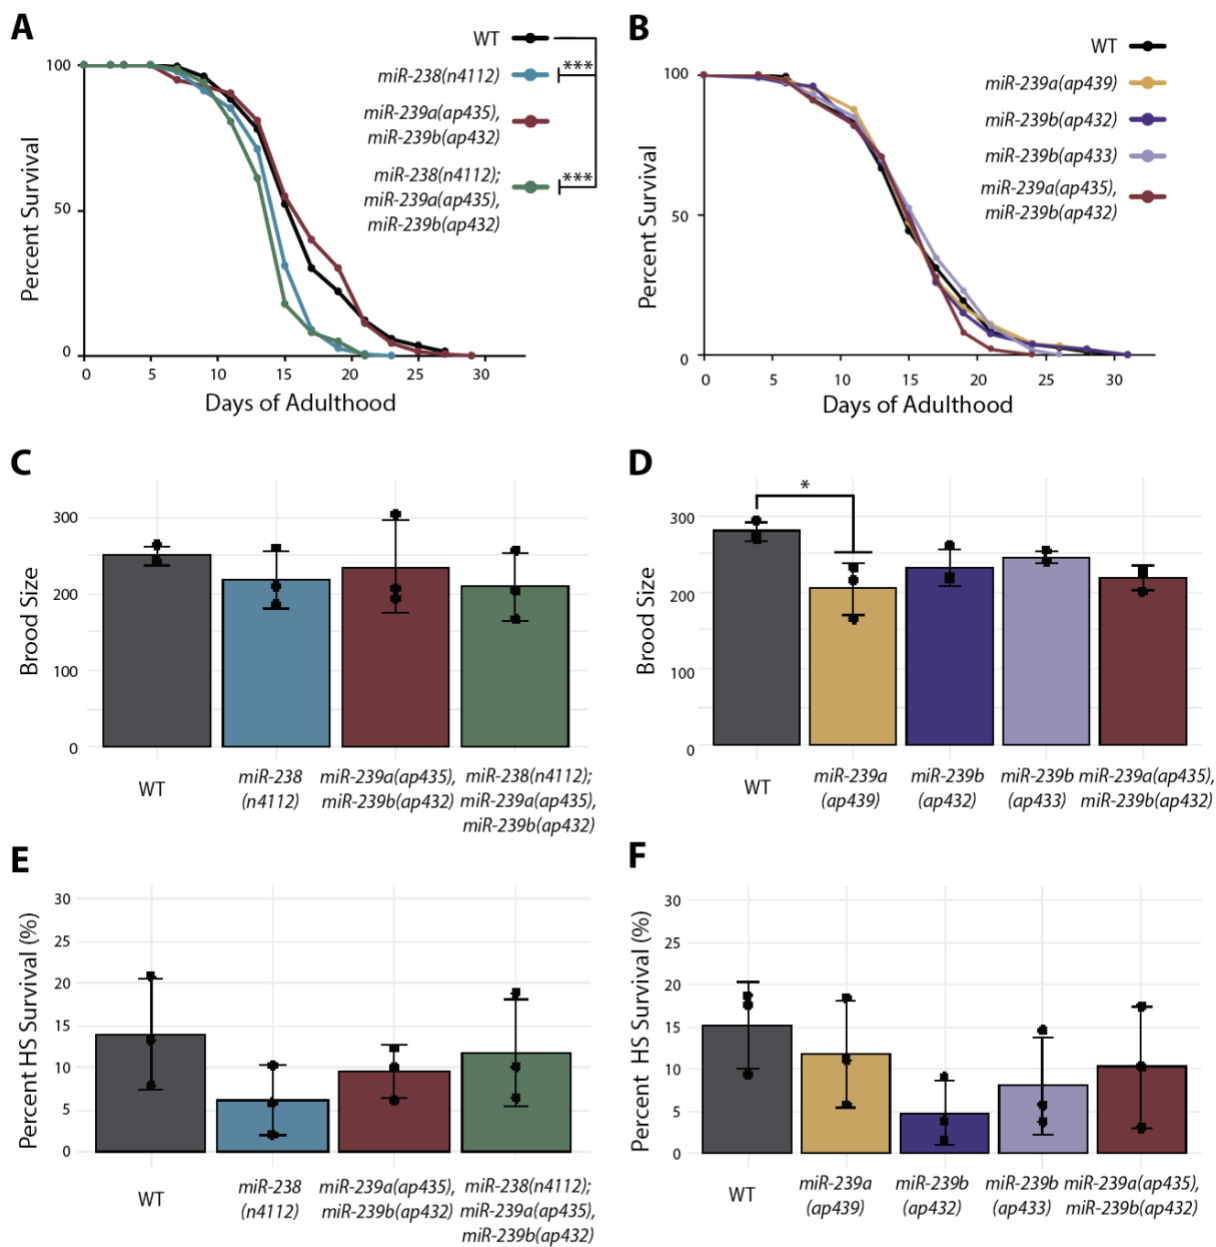

811

812 FIGURE 3

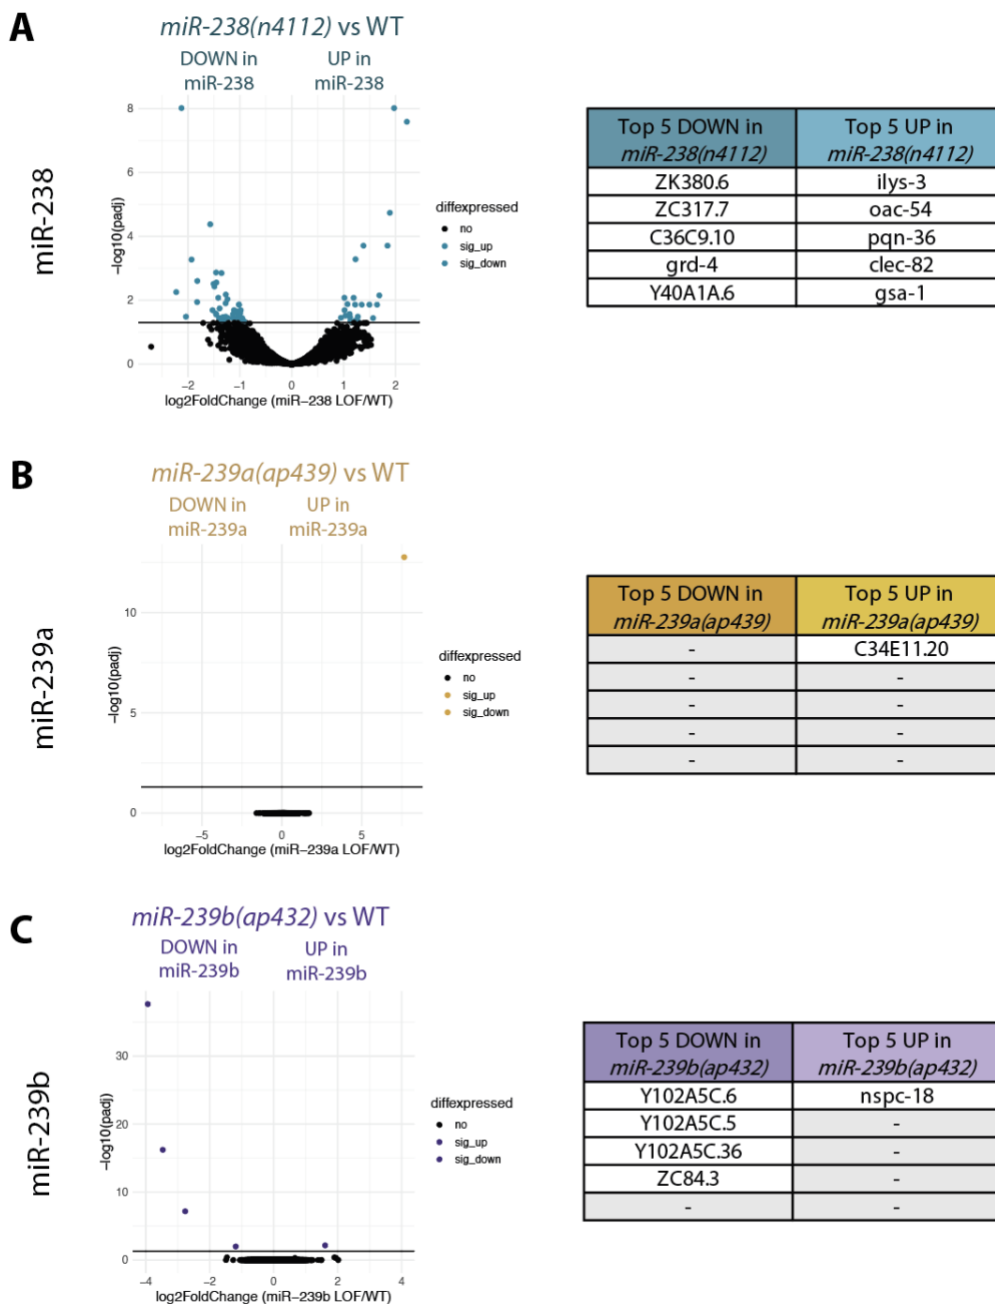

813

814 FIGURE 4

**A**

|             | RANK  |     |       |    |          |          |
|-------------|-------|-----|-------|----|----------|----------|
|             | ALG-1 |     | ALG-2 |    | FC in    | FC in    |
|             | TOTAL | RIP | RIP   |    | alg-1(-) | alg-2(-) |
|             | L4    | d5  | d5    | d5 | d5       | d5       |
| miR-238-3p  | 20    | 17  | 20    | 29 | ↓3x      | NC       |
| miR-239a-5p | 91    | 37  | 35    | 49 | NC       | NC       |
| miR-239b-5p | 83    | 41  | 48    | 54 | ↑2X      | NC       |

**B**

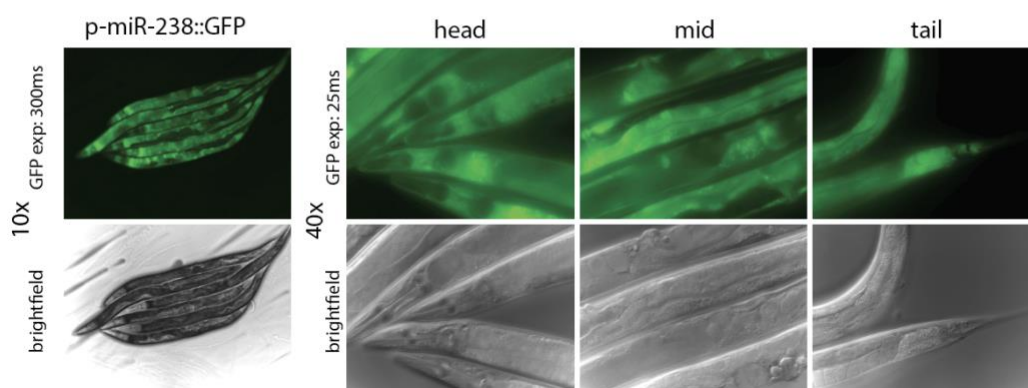

**C**

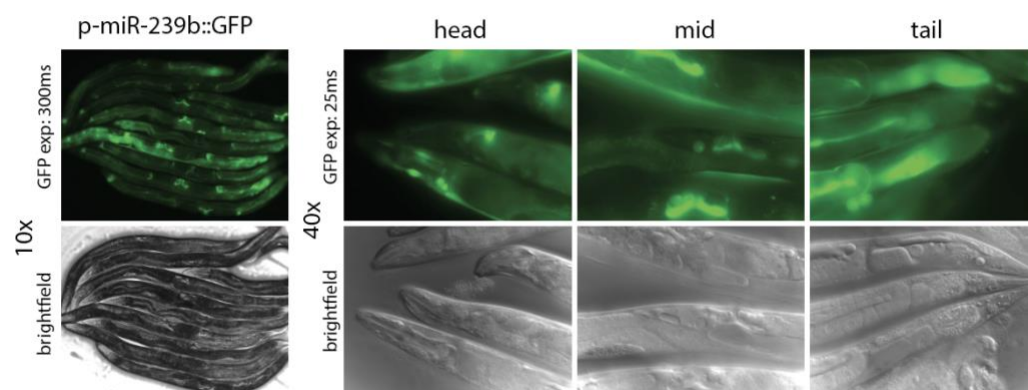

815



816 FIGURE 5

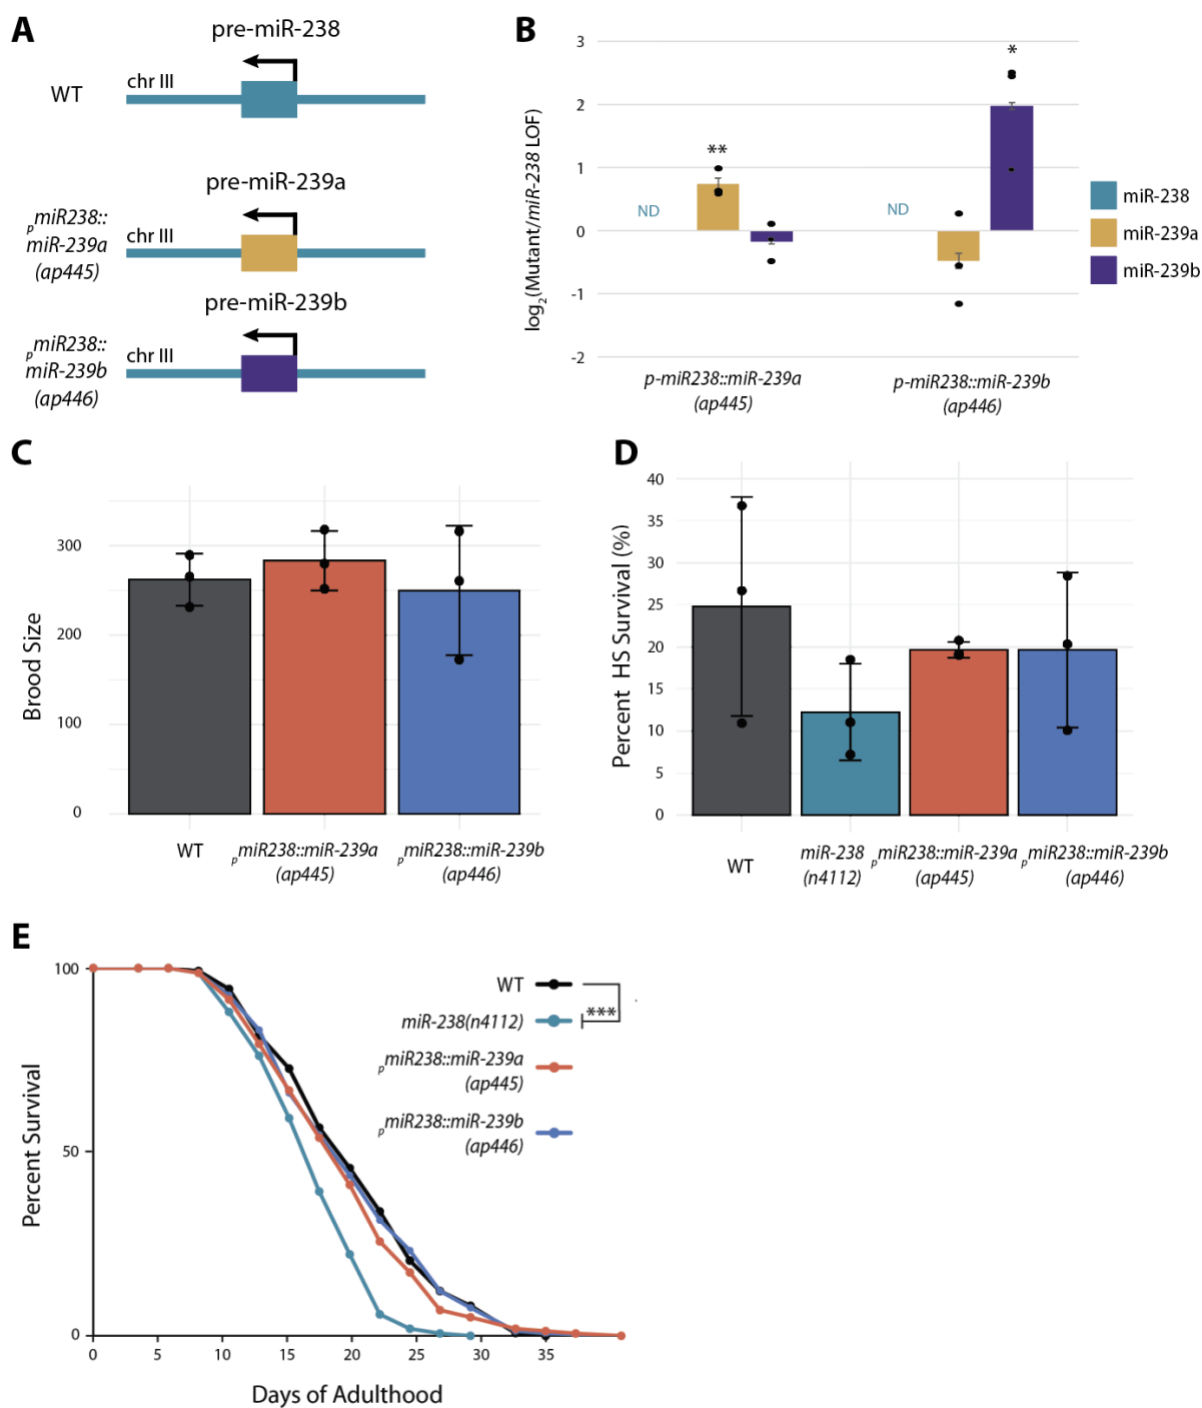

817
